# Supplementary material for: Migration and DNA methylation: a comparison of methylation patterns in type 2 diabetes susceptibility genes between indians and europeans
Source: PubMed Central journal article supplement (PMC4835020; doi:10.7243/2050-0866-2-6), 2013-02-06
Supplement: NIHMS67583-supplement-1.pdf [file NIHMS67583-supplement-1.pdf]

**Supplementary Table 1** | *ADCY5*, *FTO* and *KCNJ11* SNPs

| <b>Locus</b>  | <b>SNP</b> | <b>Urban<br/>Hyderabad<br/>(n)</b> | <b>Minor Allele<br/>Frequency<br/>(%)</b> | <b>Urban<br/>Lucknow<br/>(n)</b> | <b>Minor Allele<br/>Frequency<br/>(%)</b> | <b>RISC<br/>(n)</b> | <b>Minor Allele<br/>Frequency<br/>(%)</b> |
|---------------|------------|------------------------------------|-------------------------------------------|----------------------------------|-------------------------------------------|---------------------|-------------------------------------------|
| <i>ADCY5</i>  | rs6794936  |                                    |                                           |                                  |                                           | 320                 | 48                                        |
|               | rs17295401 |                                    |                                           |                                  |                                           | 320                 | 29                                        |
|               | rs17361324 |                                    |                                           |                                  |                                           | 318                 | 22                                        |
|               | rs6762009  |                                    |                                           |                                  |                                           | 320                 | 14                                        |
|               | rs41435846 |                                    |                                           |                                  |                                           | 320                 | 36                                        |
|               | rs16834364 |                                    |                                           |                                  |                                           | 319                 | 31                                        |
|               | rs1112274  |                                    |                                           |                                  |                                           | 320                 | 7                                         |
| <i>FTO</i>    | rs7192060  |                                    |                                           |                                  |                                           | 320                 | 13                                        |
|               | rs7404301  |                                    |                                           |                                  |                                           | 320                 | 29                                        |
|               | rs1421091  |                                    |                                           |                                  |                                           | 320                 | 33                                        |
|               | rs7203521  |                                    |                                           |                                  |                                           | 315                 | 39                                        |
|               | rs16952479 |                                    |                                           |                                  |                                           | 320                 | 4                                         |
|               | rs8048396  |                                    |                                           |                                  |                                           | 320                 | 45                                        |
|               | rs16952482 |                                    |                                           |                                  |                                           | 265                 | 9                                         |
|               | rs7186637  |                                    |                                           |                                  |                                           | 318                 | 18                                        |
|               | rs9939609  | 89                                 | 28                                        | 89                               | 42                                        | 248                 | 41                                        |
| <i>KCNJ11</i> | rs16933984 |                                    |                                           |                                  |                                           | 320                 | 19                                        |
|               | rs2214285  |                                    |                                           |                                  |                                           | 319                 | 7                                         |
|               | rs7110094  |                                    |                                           |                                  |                                           | 310                 | 12                                        |
|               | rs10832785 |                                    |                                           |                                  |                                           | 320                 | 38                                        |
|               | rs5215     |                                    |                                           |                                  |                                           | 318                 | 37                                        |
|               | rs1800467  |                                    |                                           |                                  |                                           | 289                 | 6                                         |
|               | rs5218     |                                    |                                           |                                  |                                           | 312                 | 29                                        |
|               | rs12293803 |                                    |                                           |                                  |                                           | 320                 | 7                                         |
|               | rs4148641  |                                    |                                           |                                  |                                           | 313                 | 24                                        |
|               | rs4148636  |                                    |                                           |                                  |                                           | 304                 | 11                                        |
|               | rs7947462  |                                    |                                           |                                  |                                           | 317                 | 27                                        |
|               | rs7932122  |                                    |                                           |                                  |                                           | 314                 | 10                                        |
|               | rs2355017  |                                    |                                           |                                  |                                           | 320                 | 26                                        |
|               | rs2074309  |                                    |                                           |                                  |                                           | 320                 | 41                                        |
|               | rs2237991  |                                    |                                           |                                  |                                           | 317                 | 26                                        |
|               | rs2299639  |                                    |                                           |                                  |                                           | 308                 | 20                                        |
|               | rs2299638  |                                    |                                           |                                  |                                           | 320                 | 16                                        |
|               | rs916827   |                                    |                                           |                                  |                                           | 320                 | 44                                        |
|               | rs10832786 |                                    |                                           |                                  |                                           | 320                 | 14                                        |
|               | rs4148622  |                                    |                                           |                                  |                                           | 312                 | 29                                        |
|               | rs4148618  |                                    |                                           |                                  |                                           | 320                 | 20                                        |
|               | rs11024286 |                                    |                                           |                                  |                                           | 317                 | 32                                        |
|               | rs17775256 |                                    |                                           |                                  |                                           | 320                 | 34                                        |
