# Supplementary material for: Migration and DNA methylation: a comparison of methylation patterns in type 2 diabetes susceptibility genes between indians and europeans
Source: PubMed Central journal article supplement (PMC4835020; doi:10.7243/2050-0866-2-6), 2013-02-06
Supplement: NIHMS67583-supplement-2.pdf [file NIHMS67583-supplement-2.pdf]

## **Appendix: RISC INVESTIGATORS**

### **RISC recruiting centres**

**Amsterdam, The Netherlands:** RJ Heine, J Dekker, S de Rooij, G Nijpels, W Boorsma

**Athens, Greece:** A Mitrakou, S Tournis, K Kyriakopoulou, P Thomakos

**Belgrade, Serbia:** N Lalic, K Lalic, A Jotic, L Lukic, M Civcic

**Copenhagen, Denmark:** J Nolan

**Dublin, Ireland:** TP Yeow, M Murphy, C DeLong, G Neary, MP Colgan, M Hatunic

**Frankfurt, Germany:** T Konrad, H Böhles, S Fuellert, F Baer, H Zuchhold

**Geneva, Switzerland:** A Golay, E Harsch Bobbioni, V. Barthassat, V. Makoundou, TNO Lehmann, T Merminod

**Glasgow, Scotland:** JR Petrie, C Perry, F Neary, C MacDougall, K Shields, L Malcolm

**Kuopio, Finland:** M Laakso, U Salmenniemi, A Aura, R Raisanen, U Ruotsalainen, T Sistonen, M Laitinen, H Saloranta

**London, England:** SW Coppack, N McIntosh, J Ross, L Pettersson, P Khadobaksh

**Lyon, France:** M Laville, F. Bonnet (now Rennes), A Brac de la Perriere, C Louche-Pelissier, C Maitrepierre, J Peyrat, S Beltran, A Serusclat

**Madrid, Spain:** R. Gabriel, EM Sánchez, R. Carraro, A Frieria, B. Novella

**Malmö, Sweden (1):** P Nilsson, M Persson, G Östling, **(2):** O Melander, P Burri

**Milan, Italy:** PM Piatti, LD Monti, E Setola, E Galluccio, F Minicucci, A Colleluori

**Newcastle-upon-Tyne, UK:** M Walker, IM Ibrahim, M Jayapaul, D Carman, C Ryan, K Short, Y McGrady, D Richardson

**Odense, Denmark:** H Beck-Nielsen, P Staehr, K Hojlund, V Vestergaard, C Olsen, L Hansen

**Perugia, Italy:** GB Bolli, F Porcellati, C Fanelli, P Lucidi, F Calcinaro, A Saturni

**Pisa, Italy:** E Ferrannini, A Natali, E Muscelli, S Pinnola, M Kozakova, A Casolaro, BD Astiarraga

**Rome, Italy:** G Mingrone, C Guidone, A Favuzzi, P Di Rocco

**Vienna, Austria:** C Anderwald, M Bischof, M Promintzer, M Krebs, M Mandl, A Hofer, A Luger, W Waldhäusl, M Roden

**Project Management Board:** B Balkau (Villejuif, France), SW Coppack (London, England), JM Dekker (Amsterdam, The Netherlands), E Ferrannini (Pisa, Italy), A Golay (Geneva, Switzerland), A Mari (Padova, Italy), A Natali (Pisa, Italy), J Petrie (Dundee, Scotland), M Walker (Newcastle, England)

### **Core laboratories and reading centres**

**Lipids Dublin, Ireland:** P Gaffney, J Nolan, G Boran

**Hormones Odense, Denmark:** C Olsen, L Hansen, H Beck-Nielsen

**Albumin:creatinine Amsterdam, The Netherlands:** A Kok, J Dekker

**Genetics Newcastle-upon-Tyne, England:** S Patel, M Walker

**Stable isotope laboratory Pisa, Italy:** A Gastaldelli, D Ciociaro

**Adiponectin, CRP, MBL Odense, Denmark:** Allan Flyvbjerg

**Ultrasound reading centre Pisa, Italy:** M Kozakova

**ECG reading, Villejuif, France:** MT Guillauneuf

**Actigraph, Villejuif, France:** B Balkau, L Mhamdi

**Data Management Villejuif, France, Padova, and Pisa, Italy:** B Balkau, A Mari, L Mhamdi, L Landucci, S Hills, L Mota

**Mathematical modelling and website management** Padova, Italy: A Mari, G Pacini, C Cavaggion, A Tura

**Coordinating office:** Pisa, Italy: SA Hills, L Landucci, L Mota
